# Supplementary material
Source: bioRxiv or medRxiv preprint supplement (https://medrxiv.org/highwire/filestream/68086/field_highwire_adjunct_files/0/19000687-1.pdf)
Supplement: Supplementary file [file 19000687-1.pdf]

## SUPPLEMENTARY MATERIAL

|                                                                                           |   |
|-------------------------------------------------------------------------------------------|---|
| Supplementary Material 1 – Demographic questionnaire.....                                 | 2 |
| Supplementary material 2 – Management of ECG abnormalities pre-event and post-event ..... | 3 |
| Supplementary Material 3 - Details of concerning ECG findings identified on site. ....    | 4 |

Supplementary Material 1 – Demographic questionnaire

An electronic version (excel) of the questionnaire was filled by a volunteer with the participant on site.

|                                                                                                              |                                                                                                                                                           |
|--------------------------------------------------------------------------------------------------------------|-----------------------------------------------------------------------------------------------------------------------------------------------------------|
| Bib number                                                                                                   |                                                                                                                                                           |
| Are you Canadian?                                                                                            | Yes<br>No                                                                                                                                                 |
| Date of birth (yyyy-mm-dd)                                                                                   |                                                                                                                                                           |
| Gender                                                                                                       | Male<br>Female                                                                                                                                            |
| Are you or were you pregnant in the last 12 weeks?                                                           | Yes<br>No                                                                                                                                                 |
| Are you known for any of (check any that apply)?                                                             | Hypertension<br>Diabetes<br>Cholesterol<br>Angina<br>Myocardial infarction<br>Coronary bypass / stents<br>Arrhythmia<br>Pacemaker/defibrillator<br>Stroke |
| Has anyone in your family, before the age of 60, been diagnosed with (check any that apply):                 | Myocardial infarction<br>Stroke<br>Sudden cardiac death                                                                                                   |
| List your regular medication (prescription, over the counter, natural products, nutritional supplements...): |                                                                                                                                                           |
| Number of hours dedicated to training per week                                                               | <5<br>5-15<br>>15                                                                                                                                         |
| Number of years you have been training for endurance events (>4h)                                            | <1<br>1-4<br>5-10<br>>10                                                                                                                                  |
| When was the last time you trained (more than 20 minutes of moderate to intense aerobic activity)?           | <2h ago<br>In the last 12h<br>In the last 24h<br>>24h ago                                                                                                 |
| Have you ever participated in an endurance athletic event lasting more than 4h?                              | Yes<br>No                                                                                                                                                 |
| Have you ever felt chest pain during exercise?                                                               | Yes (indicate frequency):<br>No                                                                                                                           |
| Have you ever lost consciousness during exercise?                                                            | Yes (indicate frequency):<br>No                                                                                                                           |
| <b>Added by study team post-event</b>                                                                        |                                                                                                                                                           |
| Race time (hh:mm) or DNF                                                                                     |                                                                                                                                                           |
| Visit to medical tent                                                                                        | Yes (reason for consultation)<br>No                                                                                                                       |

## Supplementary material 2 – Management of ECG abnormalities pre-event and post-event

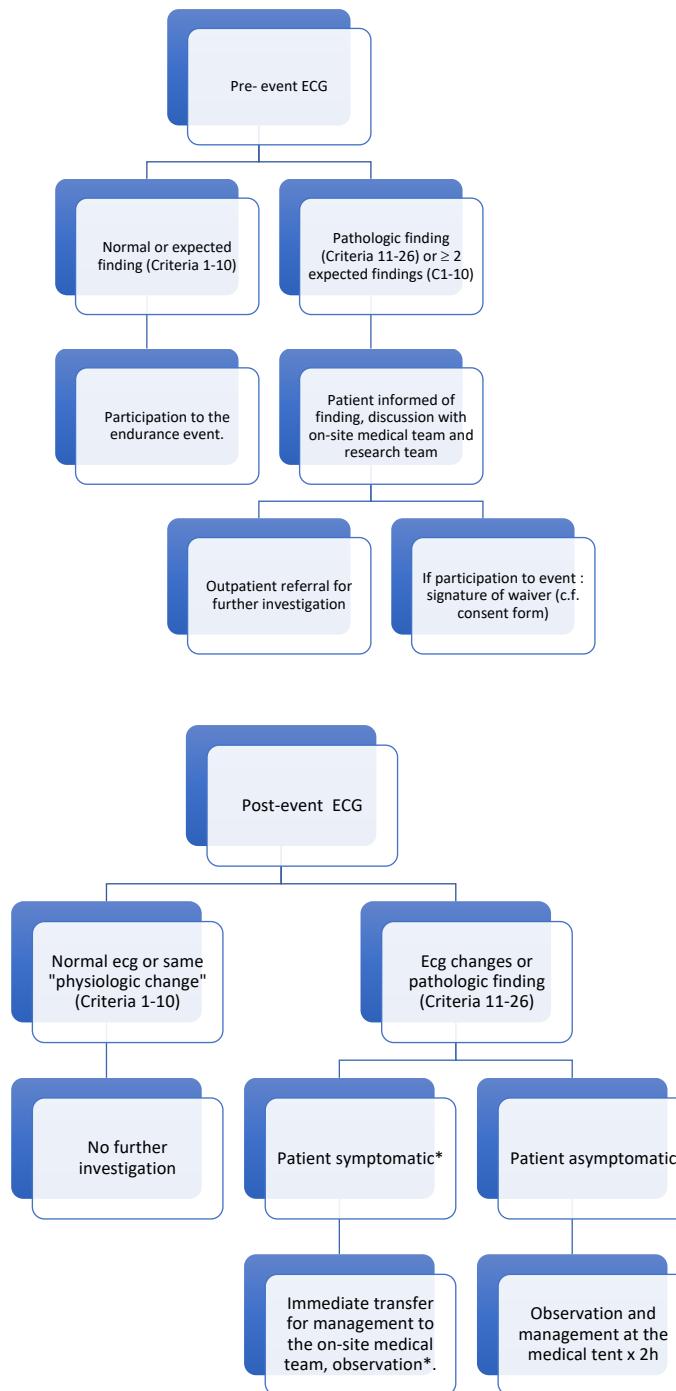

\* at any point, a symptomatic patient will be considered for immediate treatment and/or transfer by the on-site medical team.

Supplementary Material 3 – Details concerning ECG findings identified on site.

| Abnormal finding                                                                                                           | Investigation                                                                                                                       |
|----------------------------------------------------------------------------------------------------------------------------|-------------------------------------------------------------------------------------------------------------------------------------|
| <b>PRE</b>                                                                                                                 |                                                                                                                                     |
| Q wave pre-race, resolved.                                                                                                 | Sent for cardiologist evaluation and ECHO that day.<br>Normal work up                                                               |
| Q wave pre – race, resolved<br><br>BER post- race de novo.                                                                 | Follow-up with primary care provider.                                                                                               |
| LAD pre and post-race.                                                                                                     | Normal cardiac work-up with cardiologist post-race                                                                                  |
| LBBB and IVCD identified pre and post-race.<br><br>T-wave inversion pre-race, resolved.<br><br>Long QT post-race, de novo. | Previous negative cardiac work-up with cardiologist including normal echocardiogram.<br><br>Follow- up with cardiologist organized. |
| Q wave pre-race, persisted.                                                                                                | Declined further on-site investigation and work –up<br><br>Follow-up with primary care provider.                                    |
| LAD pre-race, resolved.                                                                                                    | Previous negative cardiac work-up with cardiologist including normal echocardiogram.<br><br>Follow- up with cardiologist organized. |
| Incomplete RBBB,, LVH, BER (persistent) and TWI (resolved) pre-race.<br><br>Long QT post-race, de novo.                    | Declined further on-site investigation and work –up<br><br>Follow-up with cardiologist organized.                                   |
| <b>POST</b>                                                                                                                |                                                                                                                                     |
| LAE post-race, de novo.                                                                                                    | Follow-up with primary care provider.                                                                                               |
| Long QT post-race, de novo.                                                                                                | Had previous normal cardiac work-up by primary care provider.<br><br>Follow-up with cardiologist organized.                         |
